# Supplementary material for: Synthesis and structure of the framework scandium methylphosphonates ScF(H2O)CH3PO3 and NaSc(CH3PO3)2·0.5H2O
Source: Royal Society of Chemistry journal article supplement (doi:10.1039/b504466a), 2005-01-01

**Electronic Supporting Information (non-CIF) Dalton b50466a**

**Synthesis and structure of the framework scandium methylphosphonates  
ScF(H<sub>2</sub>O)MePO<sub>3</sub> and NaSc(CH<sub>3</sub>PO<sub>3</sub>)<sub>2</sub>·0.5H<sub>2</sub>O**

Stuart R. Miller,<sup>1</sup> Emily Lear,<sup>1</sup> Jorge Gonzalez,<sup>1</sup> Alexandra M. Z. Slawin,<sup>1</sup> Paul A. Wright,<sup>1</sup> Nathalie Guillou,<sup>2</sup> Gérard Férey<sup>2</sup>

Supplementary Figure 1.

XRD of unsolved ScMePO- $\alpha$  structure prepared from a gel of composition Sc<sub>2</sub>O<sub>3</sub> : CH<sub>3</sub>PO<sub>3</sub>H<sub>2</sub> : H<sub>2</sub>O of 1 : 3 : 40 at 463 K. Scandium oxide peaks asterisked.

Supplementary Figure 2.

Matched powder XRD patterns of ScF(H<sub>2</sub>O)CH<sub>3</sub>PO<sub>3</sub>.

Supplementary Figure 3.

<sup>31</sup>P MASNMR of NaSc(CH<sub>3</sub>PO<sub>3</sub>)<sub>2</sub> · 0.5H<sub>2</sub>O

Supplementary Figure 4.

Matched powder XRD of pure NaSc(CH<sub>3</sub>PO<sub>3</sub>)<sub>2</sub> · 0.5H<sub>2</sub>O

Supplementary Figure 5.

Wideline <sup>2</sup>H NMR spectra of perdeuterated sodium scandiummethylphosphonate at a) 273 K and b) 123 K. Both spectra are uniaxial powder patterns with sharp singularities at  $\pm 21$  kHz, indicating that the methyl group undergoes rotations in the fast limit of motion over the temperature range 123 - 273 K.

Supplementary Figure 1.

XRD of unsolved ScMePO- $\alpha$  structure prepared from a gel of composition  $\text{Sc}_2\text{O}_3$  :  $\text{CH}_3\text{PO}_3\text{H}_2$  :  $\text{H}_2\text{O}$  of 1 : 3 : 40 at 463 K. Scandium oxide peaks asterisked.

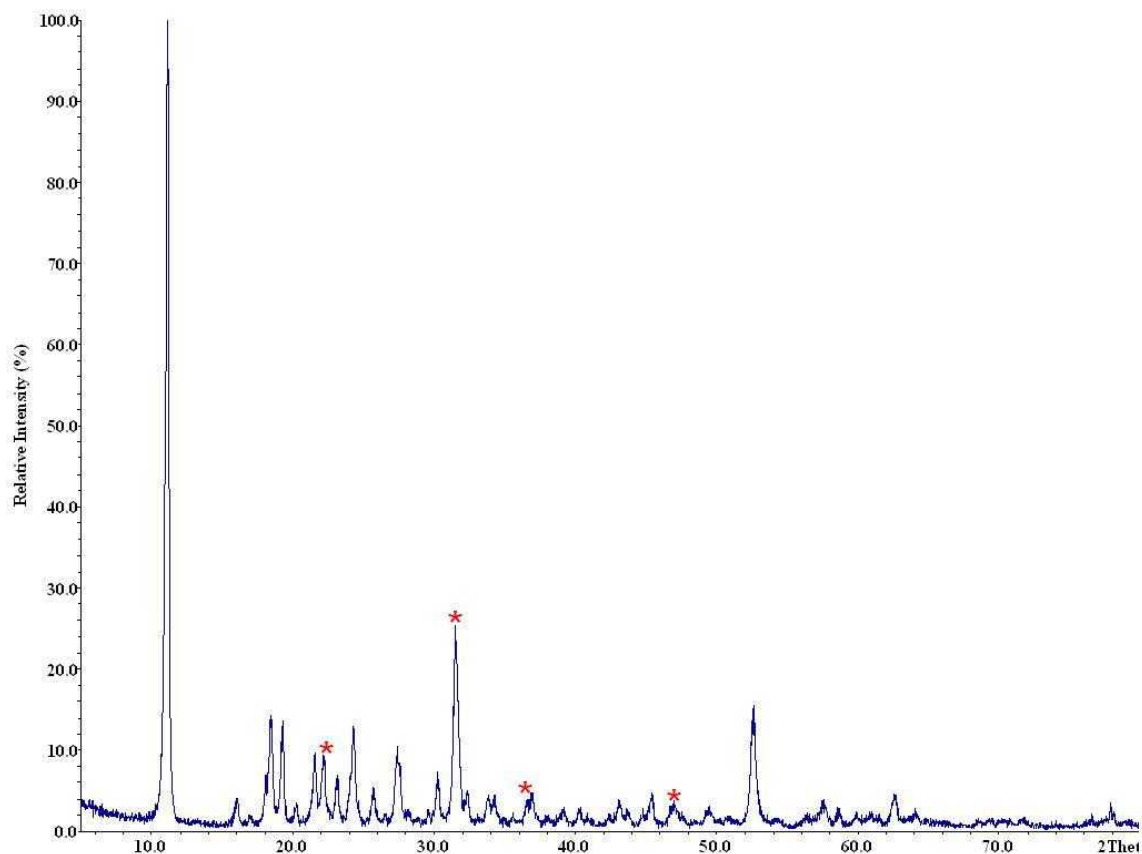

Supplementary Figure 2.

Matched powder XRD patterns of  $\text{ScF}(\text{H}_2\text{O})\text{CH}_3\text{PO}_3$ . Peaks from diffractometer excluded

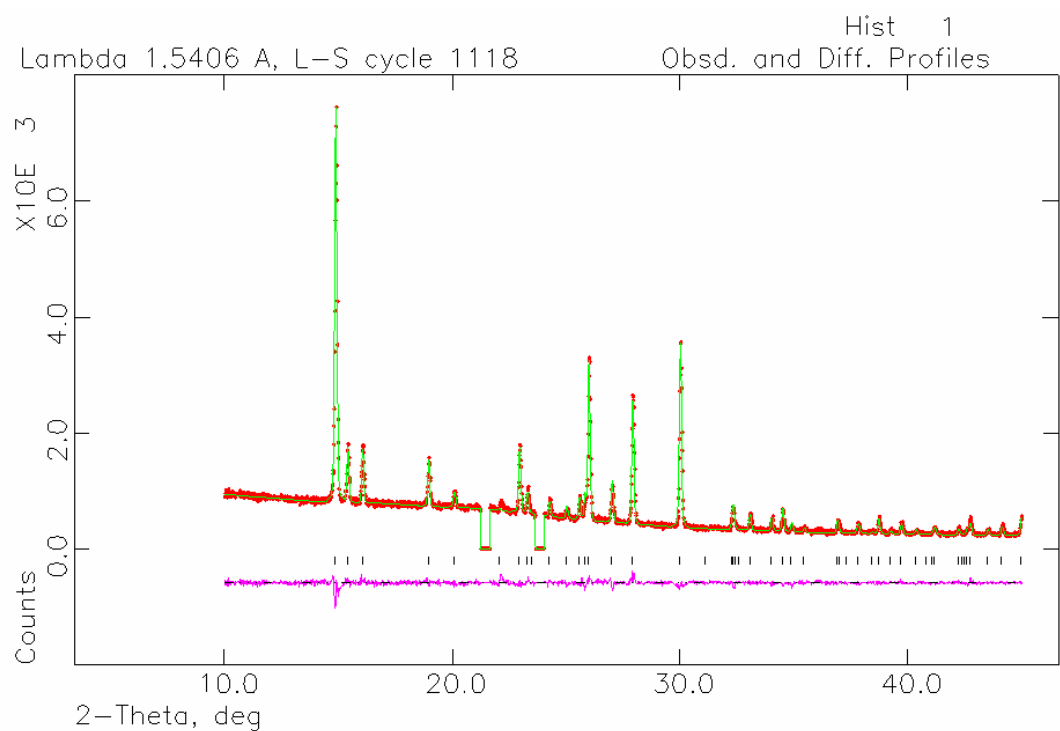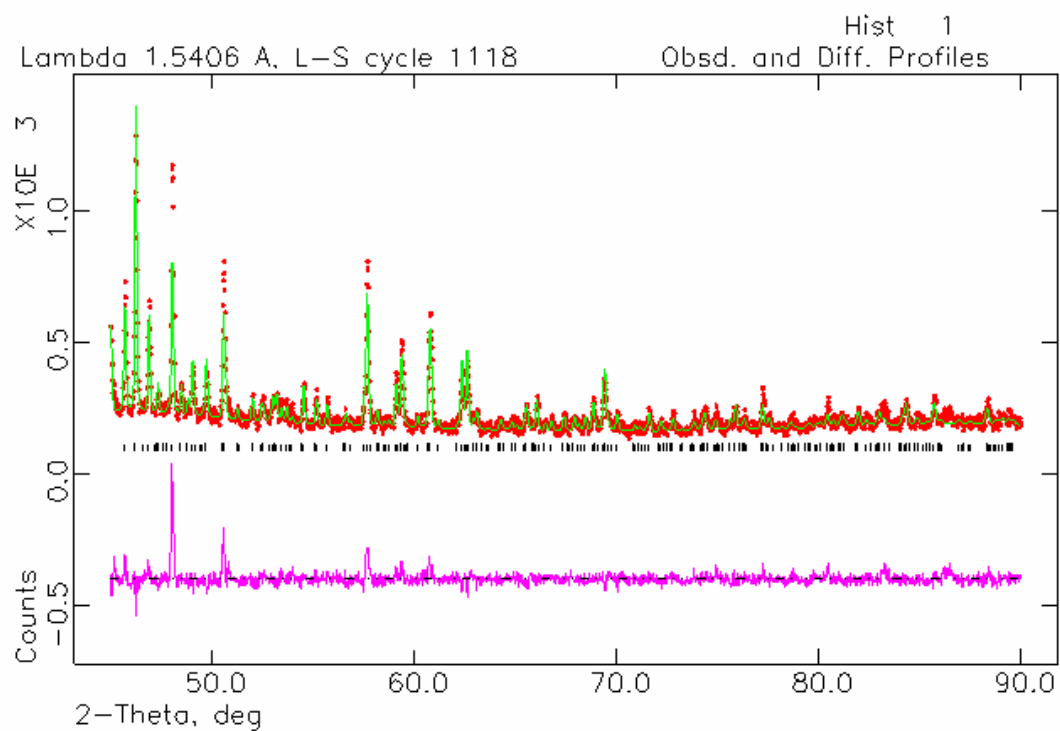

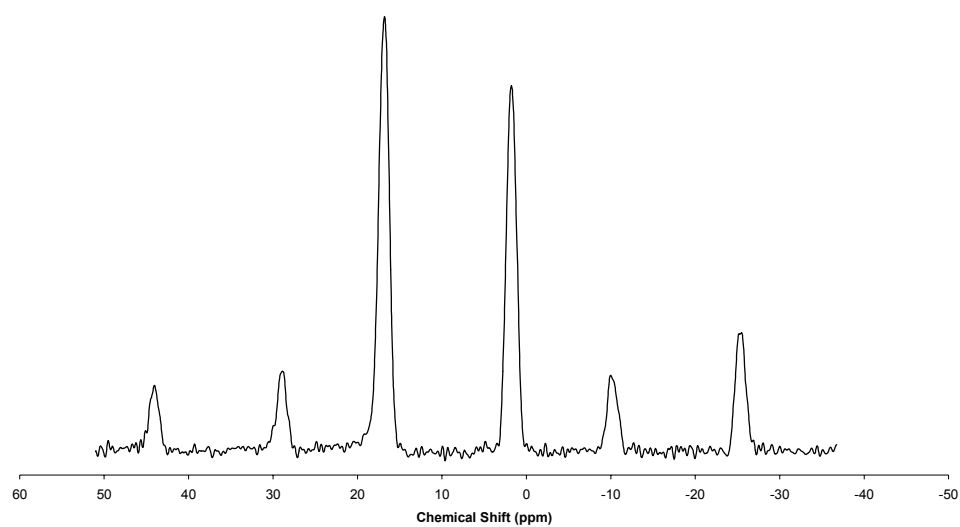

Supplementary Figure 3.  $^{31}\text{P}$  MASNMR of  $\text{NaSc}(\text{CH}_3\text{PO}_3)_2 \cdot 0.5\text{H}_2\text{O}$

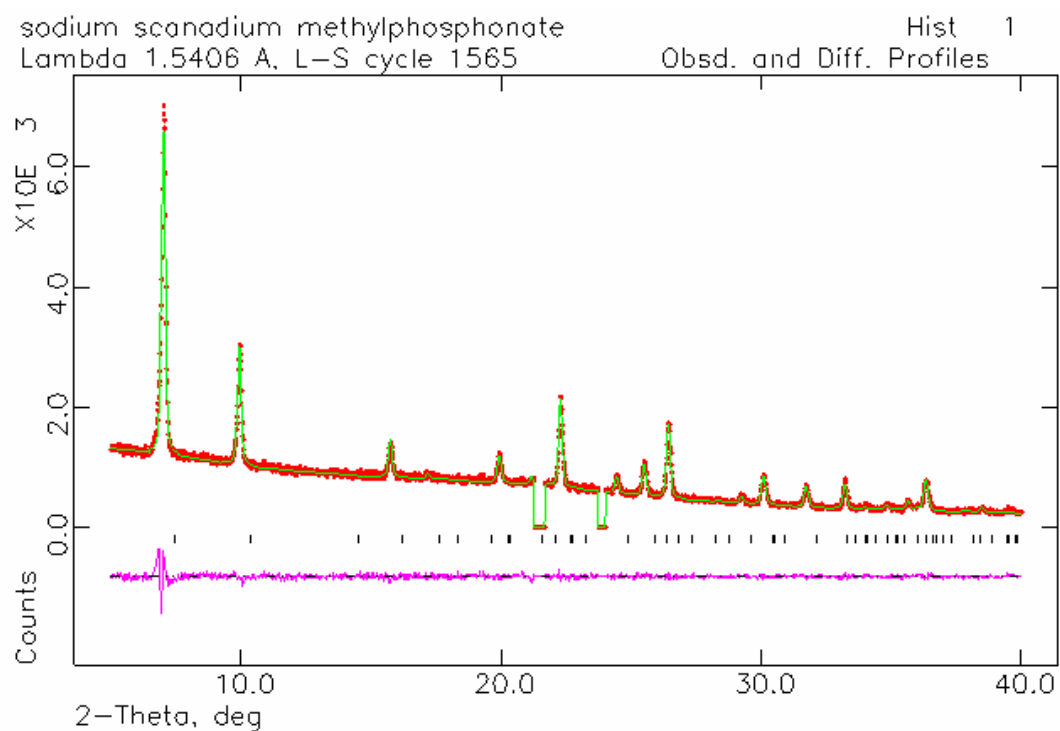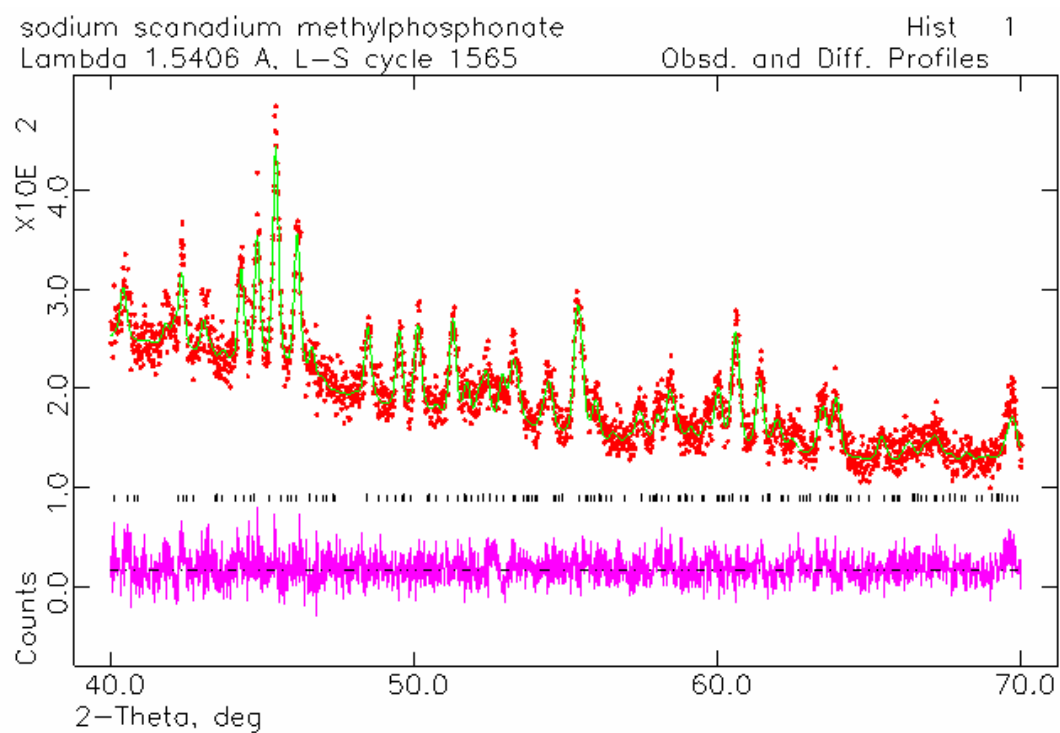

Supplementary Figure 4.

Matched powder XRD of pure  $\text{NaSc}(\text{CH}_3\text{PO}_3)_2 \cdot 0.5\text{H}_2\text{O}$

Supplementary Figure 5.

Wideline  $^2\text{H}$  NMR spectra of perdeuterated sodium scandiummethylphosphonate at a) 273 K and b) 123 K. Both spectra are uniaxial powder patterns with sharp singularities at  $\pm 21$  kHz, indicating that the methyl group undergoes rotations in the fast limit of motion over the temperature range 123 - 273 K.

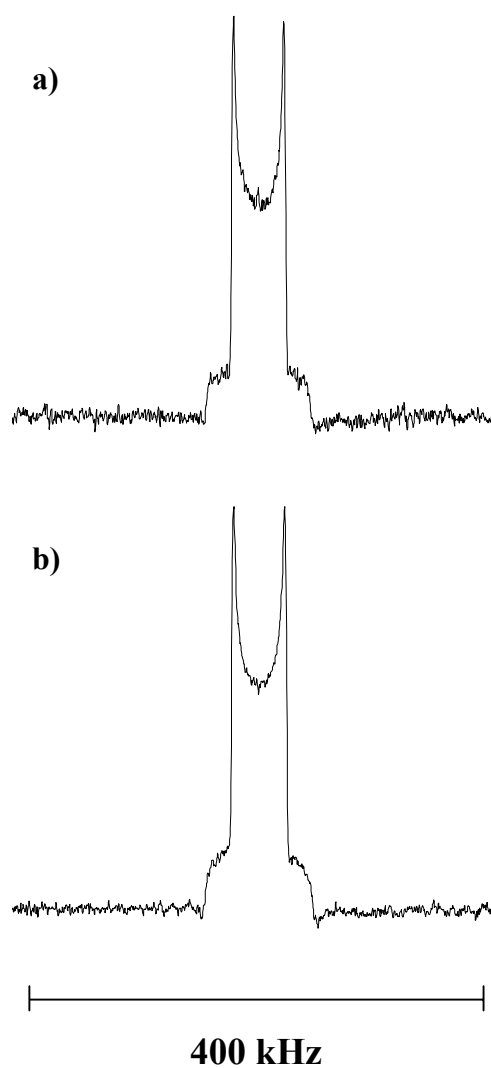

Supplement: b504466a.pdf [file b504466a.pdf]
